# Supplementary material
Source: Springer Nature journal article supplement (https://www.springermedizin.de/resource/supplementary/13041_2013_249_MOESM1_ESM.pdf/25657890)

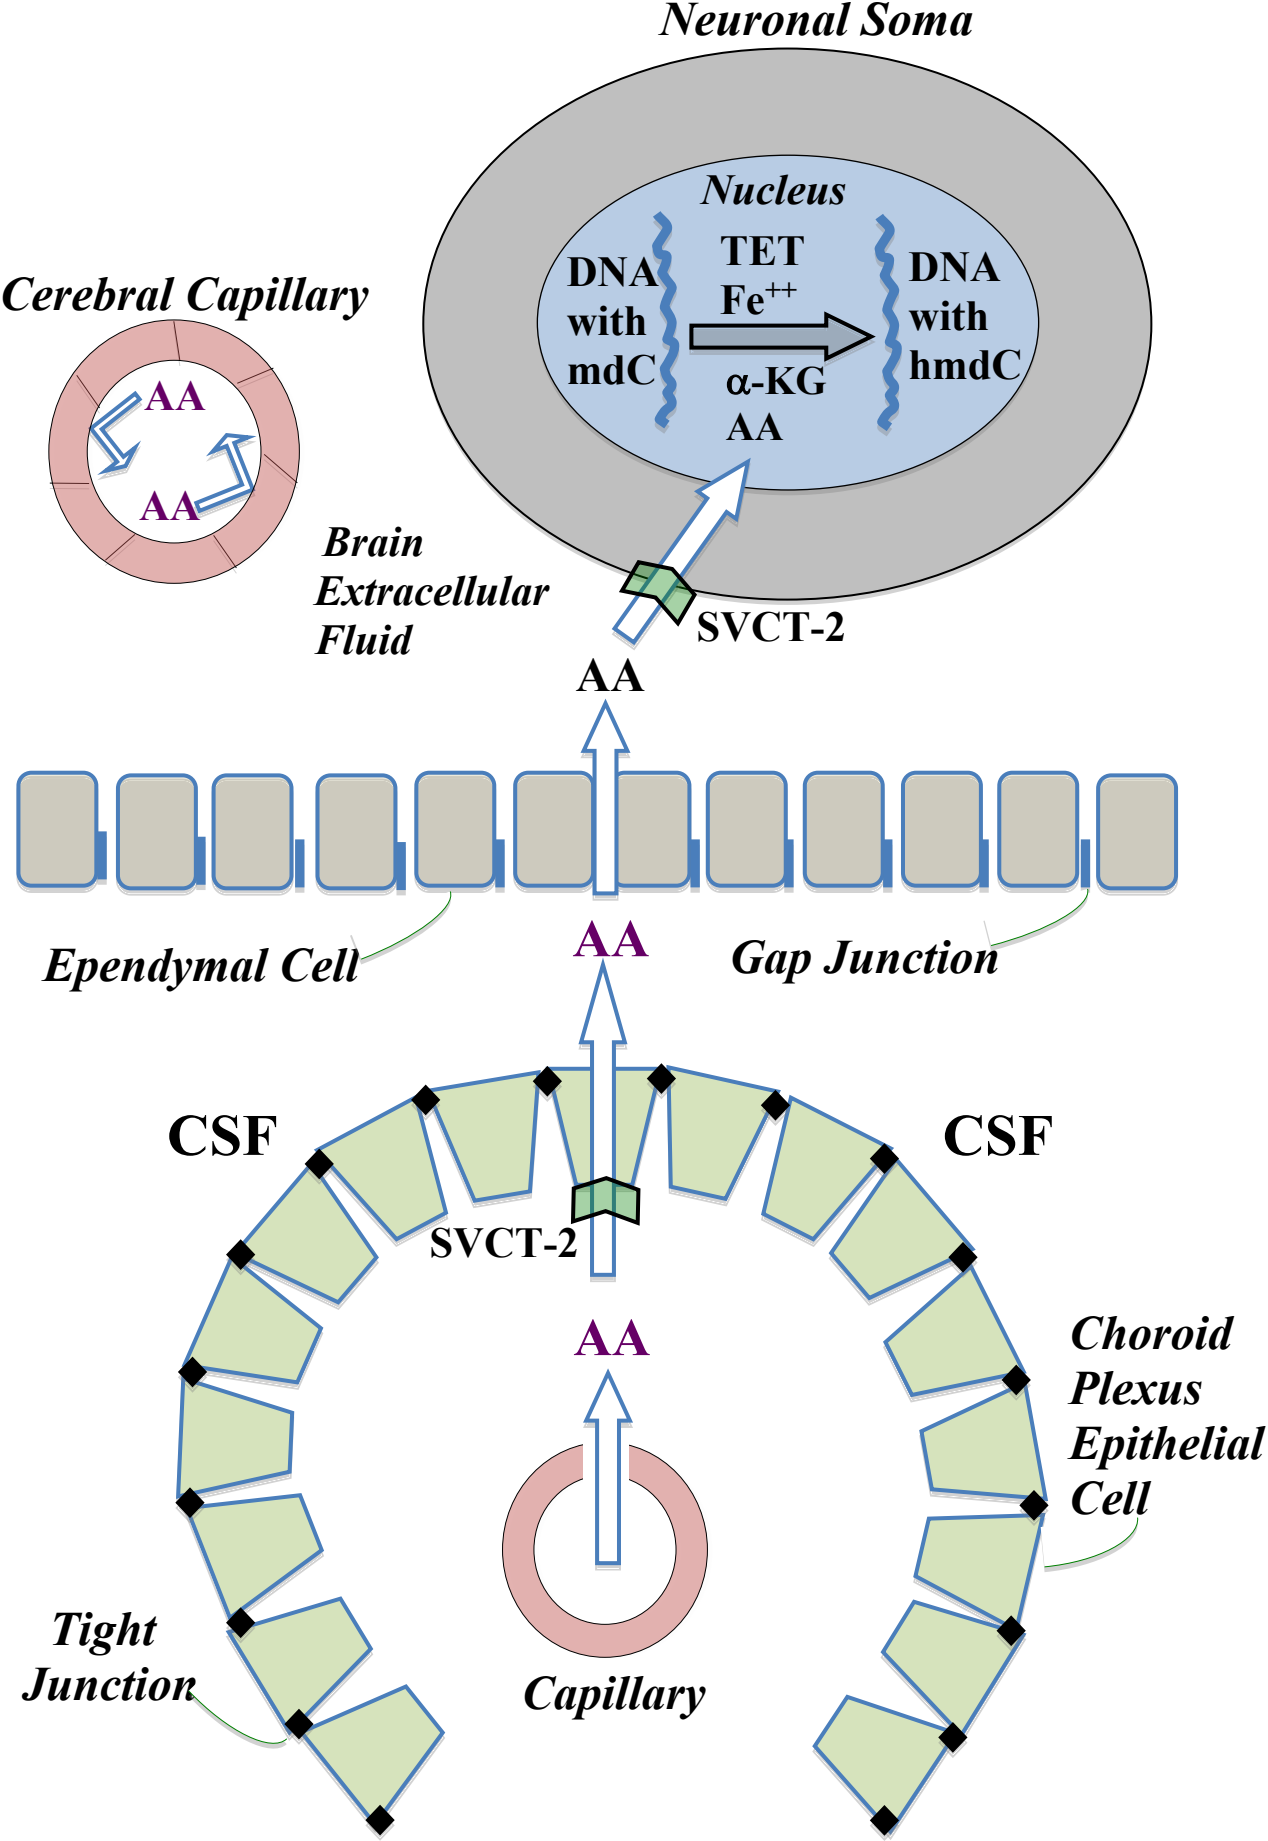

Supplement: MOESM1 [file 25657890]
